# Supplementary material for: Effects of Organic Solvents on the Organosolv Pretreatment of Degraded Empty Fruit Bunch for Fractionation and Lignin Removal
Source: MDPI journal article supplement (doi:10.3390/su13126757), 2021-06-15
Supplement: s1 [file s1]

## Supplementary Material

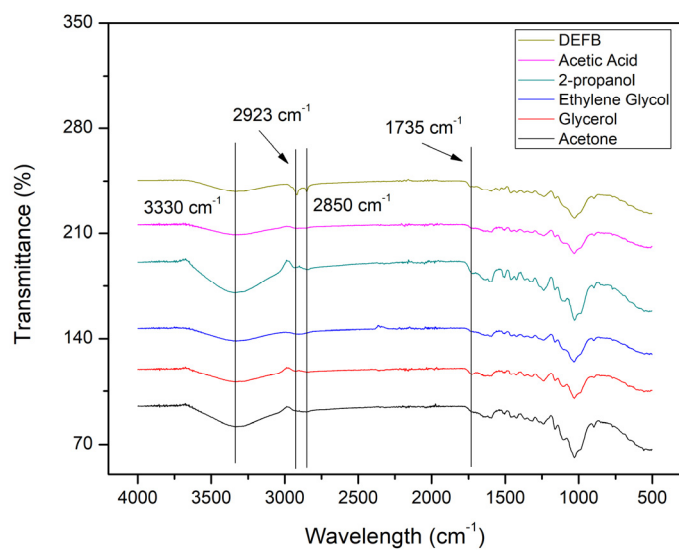

**Supplementary Figure S1.** FTIR spectrum of treated DEFB by different organic solvents

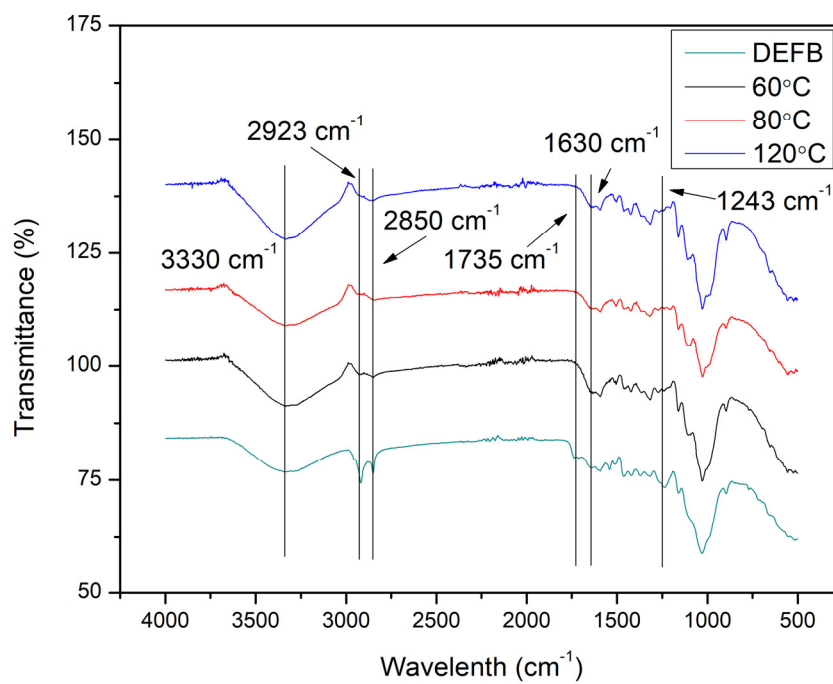

**Supplementary Figure S2.** FTIR spectrum of treated DEFB at different pretreatment temperatures (60, 80 and 120 °C) and untreated DEFB

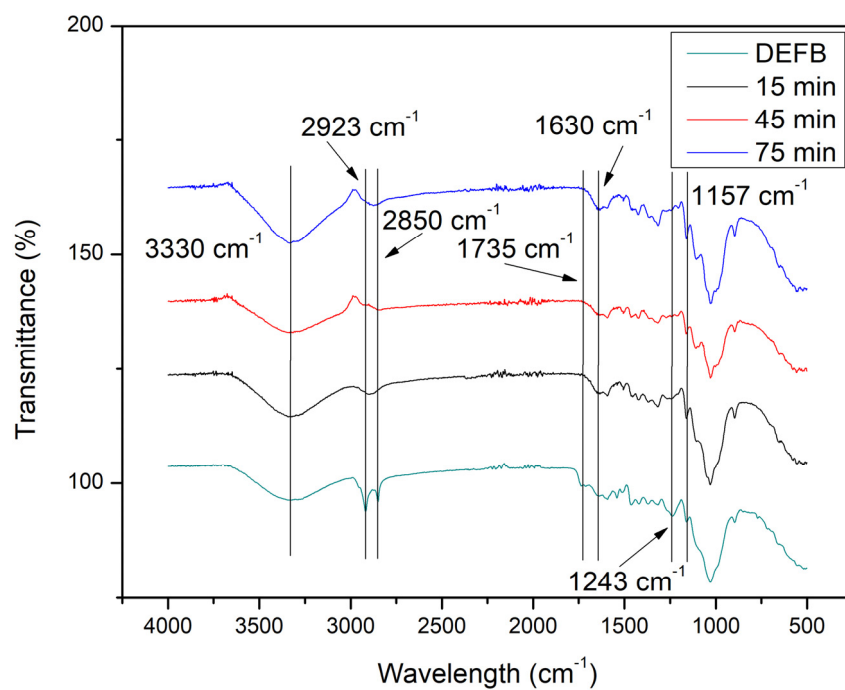

**Supplementary Figure S3.** FTIR spectrum of treated DEFB at different residence times and untreated DEFB

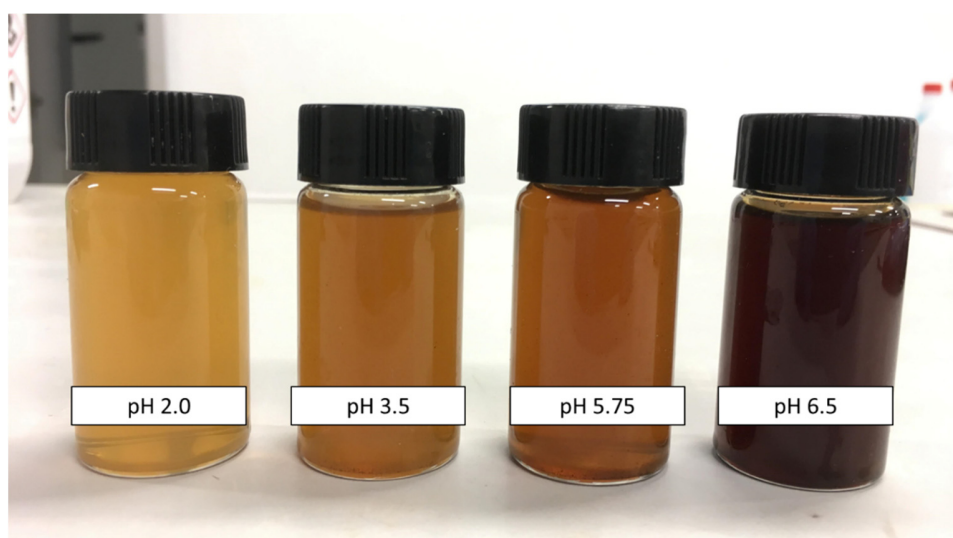

**Supplementary Figure S4.** The colour changes of pretreatment liquor after the removal of precipitated lignin at different pH values
